# Supplementary material
Source: PubMed Central journal article supplement (PMC4193797)
Supplement: NIHMS596999-supplement-Supplemental.pdf [file NIHMS596999-supplement-Supplemental.pdf]

# Bio-functionalized graphene-graphene oxide nanocomposite based electrochemical immunosensing

Priyanka Sharma<sup>a</sup>, Satish K. Tuteja<sup>a</sup>, Vijayender Bhalla<sup>a</sup>, G. Shekhawat<sup>\*b</sup>, Vinayak P. Dravid<sup>\*b</sup> and C. Raman Suri<sup>a\*</sup>

Corresponding authors, Tel/Fax: +91-172-6665225/2690632, E-mail addresses: [raman@imtech.res.in](mailto:raman@imtech.res.in) (C.R. Suri), [g-shekhawat@northwestern.edu](mailto:g-shekhawat@northwestern.edu) (G. Shekhawat)

## Supporting Information

Figures S1-S4: Characterization of chemically synthesized GO and electrochemically transformed fG-GO.

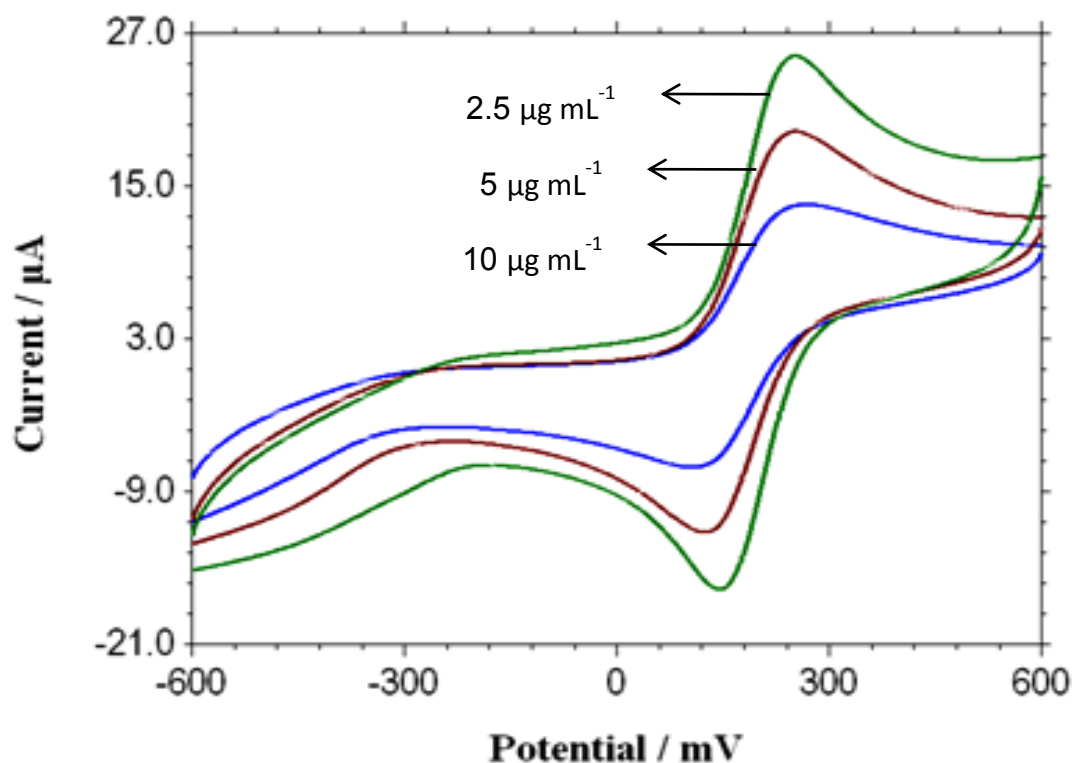

**Figure S1.** Cyclic Voltammograms recorded in 2.5 mM ferrocyanide solution after three reductive scans of GO. Concentration optimisation of different concentrations ( $2.5 - 10 \mu\text{g mL}^{-1}$ ) of GO dropcasted on SPE and CV scans were taken after the reductive scans.

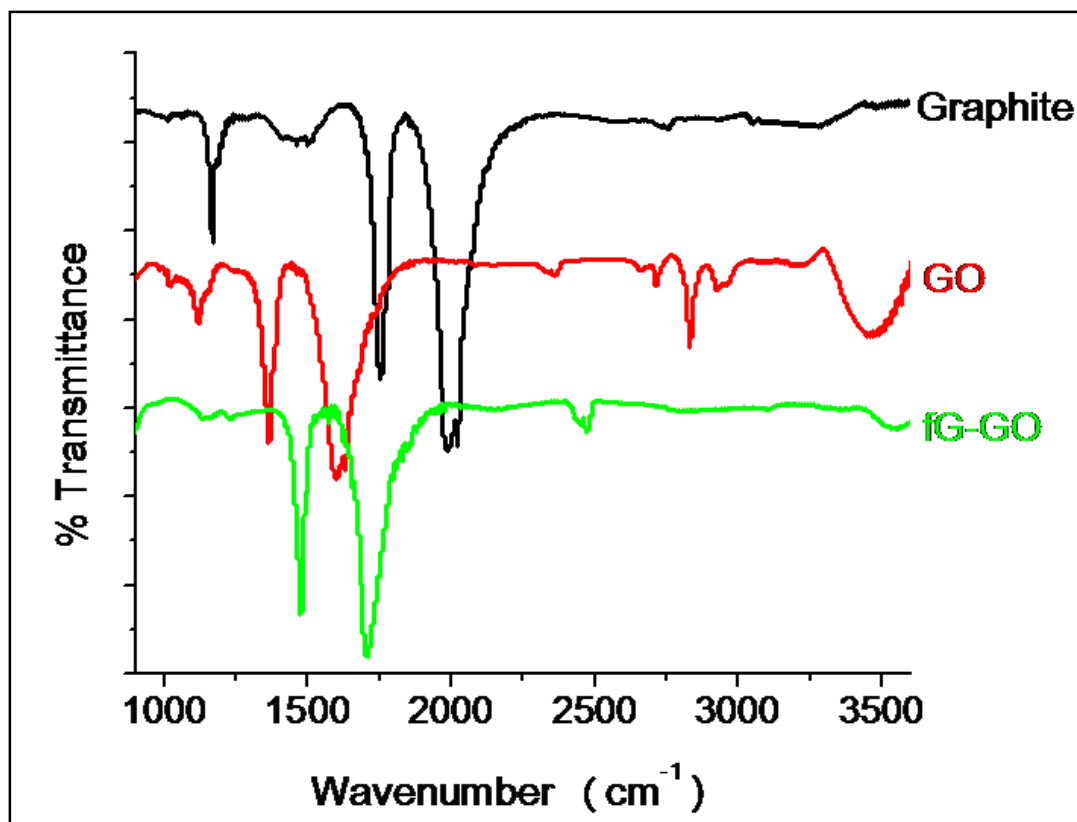

**Figure S2.** Shows the concentration profile of the diuron induced electrochemical signal change in a competitive assay format.  $25 \mu\text{g mL}^{-1}$  antibody concentration was used for immunoassay development Elemental analysis by FT-IR showing the spectra of graphite, GO and fG-GO. The spectra indicated that no significant peak was found in graphite, whereas the presence of different type of oxygen functionalities in GO were observed.

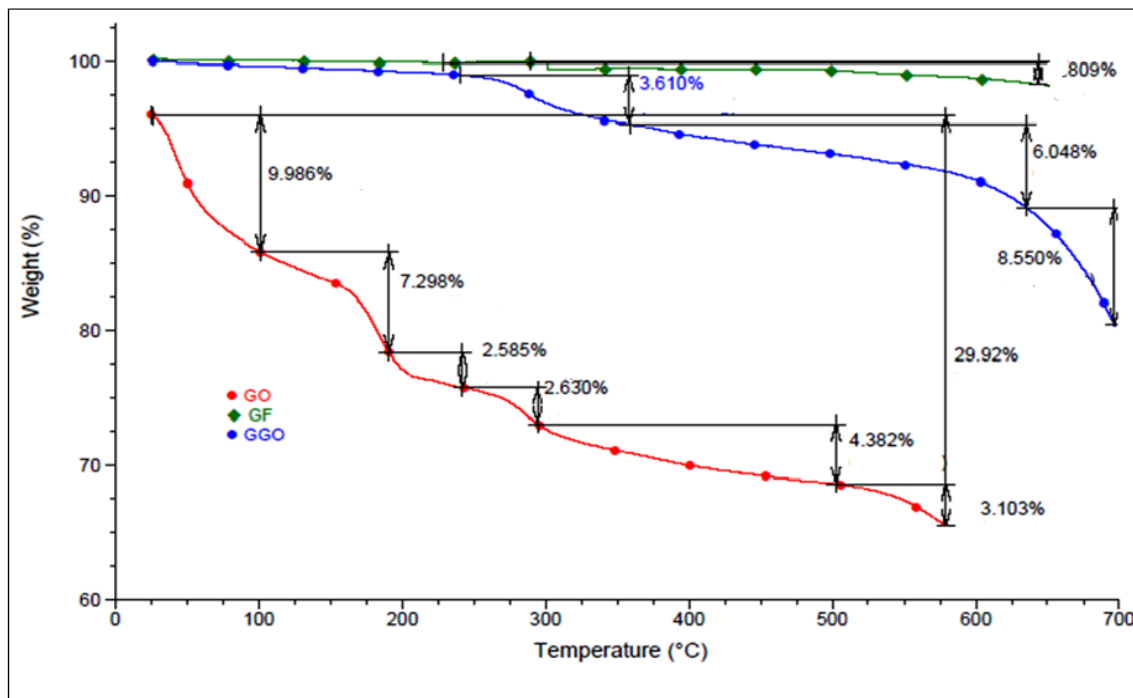

**Figure S3.** Normalised TGA plots of graphite, GO and fG-GO showing percentage weight loss vs decomposition temperature. Heat rate was selected at  $10\text{ }^{\circ}\text{C min}^{-1}$  and kept constant for all samples.

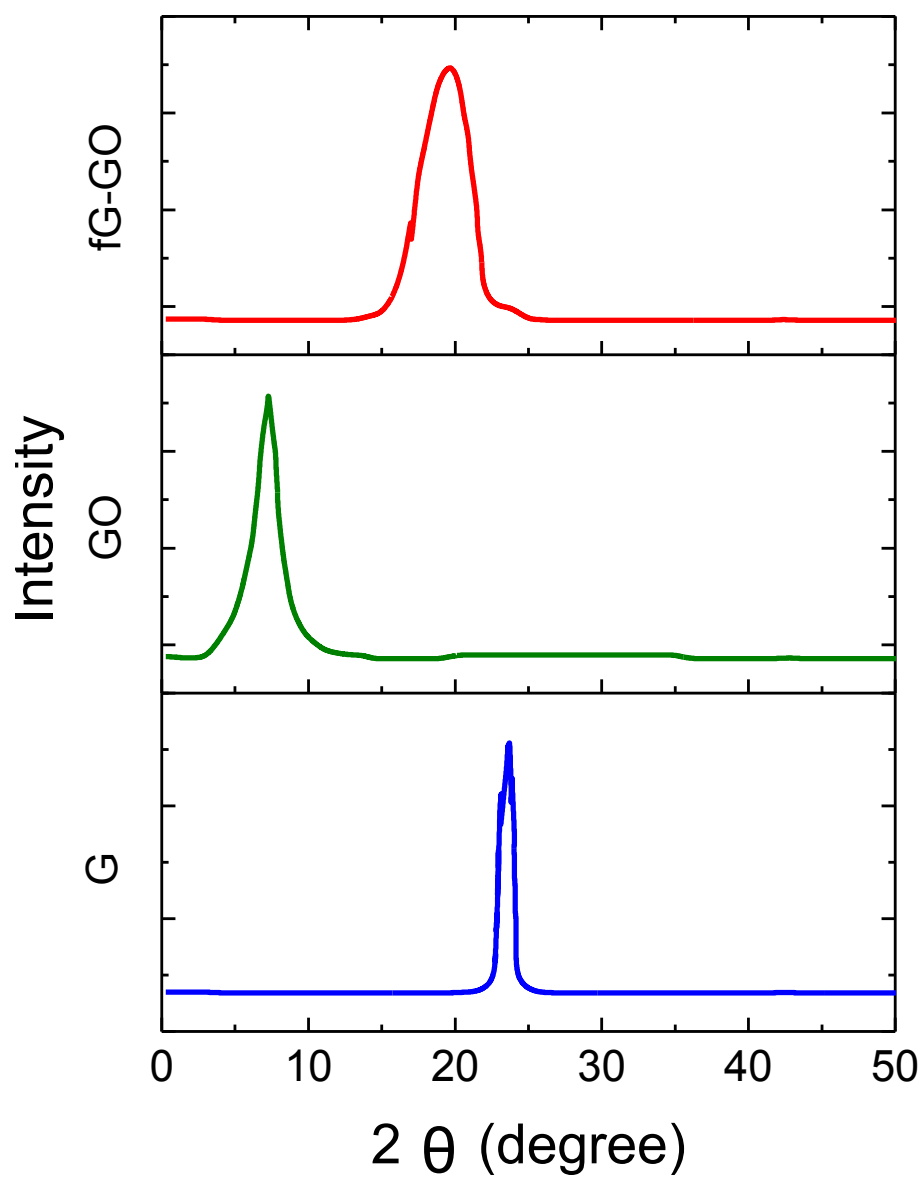

**Figure S4:** X-ray powder diffraction patterns of graphite flakes (G), graphene oxide (GO) and fG-GO nanocomposite.
